# Supplementary material
Source: PubMed Central journal article supplement (PMC4145132)
Supplement: supp_tpc.114.125880_tpc125880_SupplementalData_.pdf [file supp_tpc.114.125880_tpc125880_SupplementalData_.pdf]

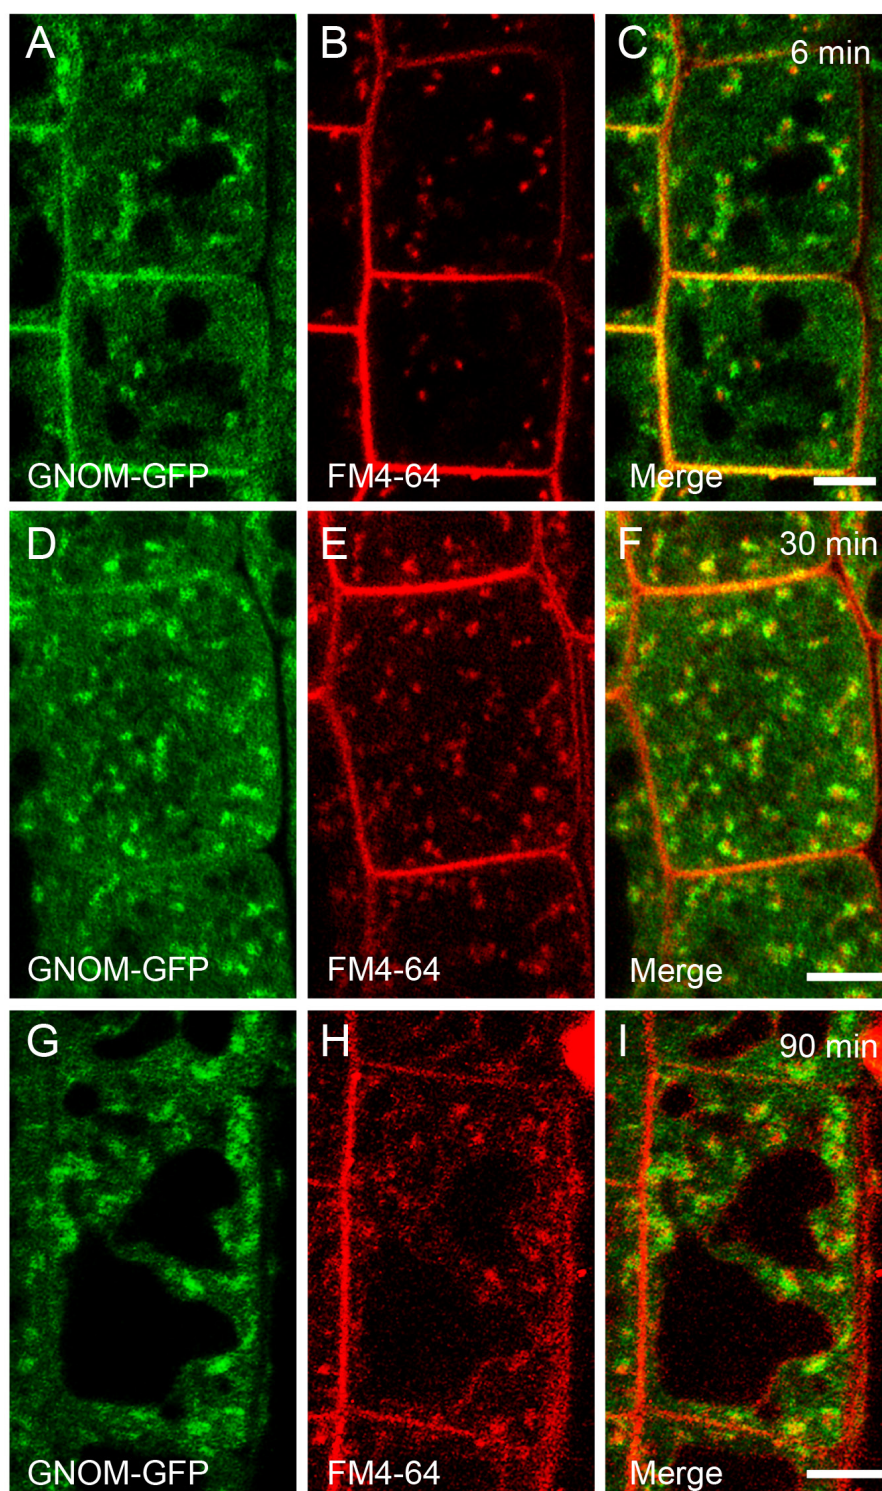

**Supplemental Figure 1.** GNOM-GFP is less efficiently stained by the endocytosis tracer FM4-64. (A) to (I) Double-labeling of GNOM-GFP (green) and FM4-64 (red) in root epidermal cells.

Subcellular localization of GNOM-GFP [(A), (D), and (G)], FM4-64 [(B), (E), and (H)], and their merged images [(C), (F), and (I)] are shown. Incubation times with FM4-64 are indicated on the merged image.

Bars = 3  $\mu$ m.

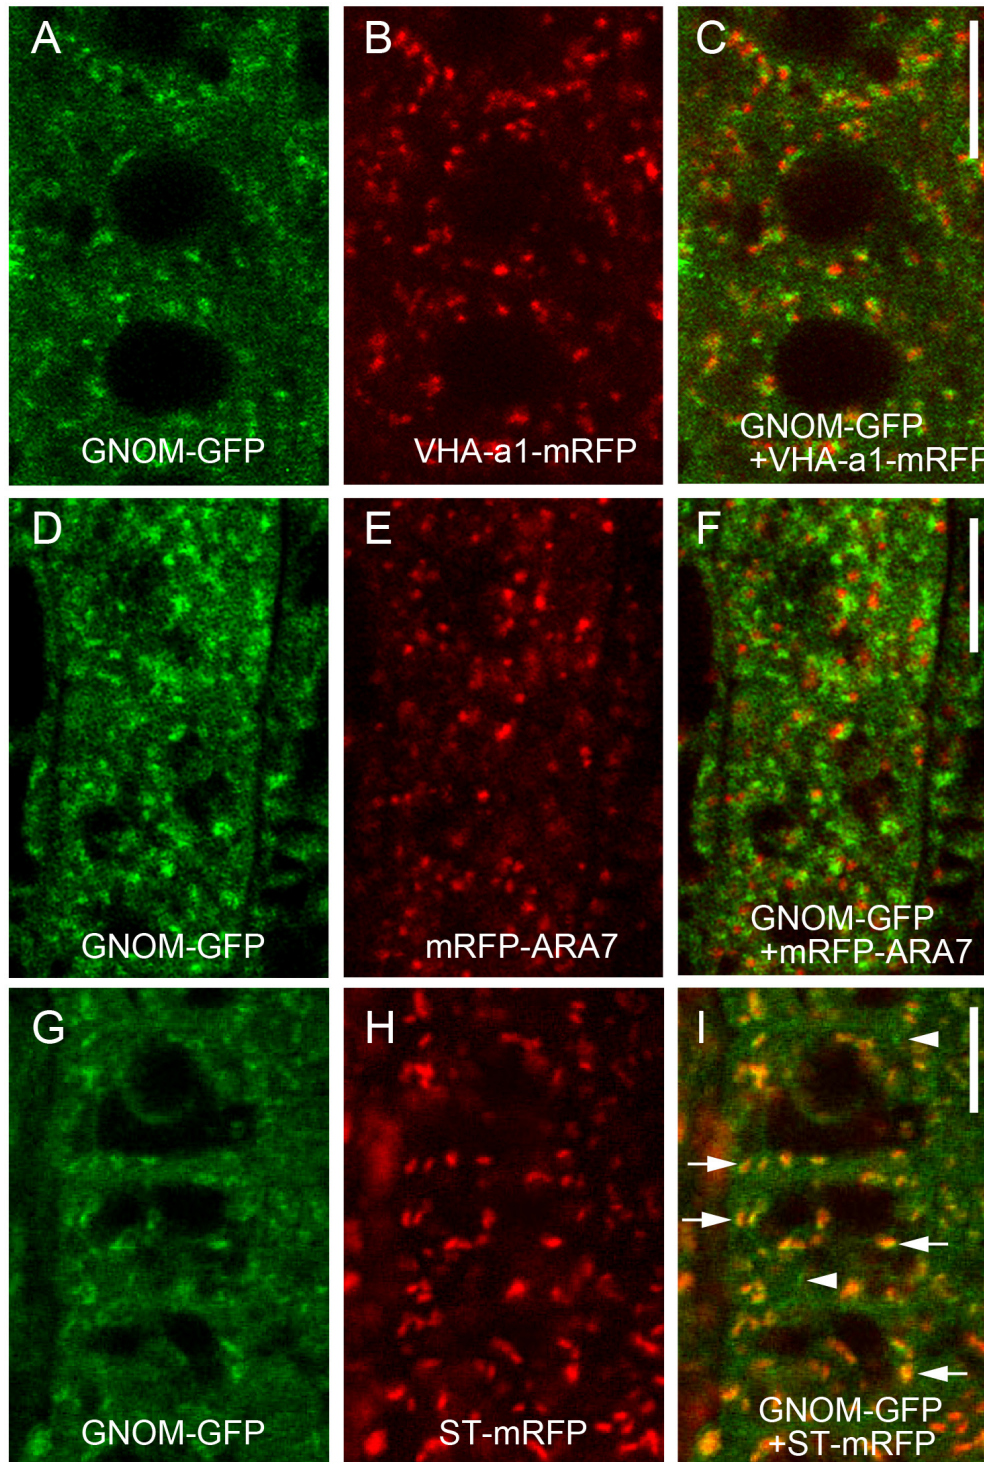

**Supplemental Figure 2.** The distribution of GNOM-GFP and RFP-tagged organelle markers. **(A)** to **(I)** Double-labeling of GNOM-GFP (green) and RFP-tagged organelle markers (red) in root epidermal cells. GNOM-GFP does not colocalize with VHA-a1-mRFP-labeled **[(A) to (C)]** or mRFP-ARA7-labeled **[(D) to (F)]** organelles, whereas GNOM-GFP strongly colocalizes with ST-mRFP-labeled Golgi apparatus **[(G) to (I)]**. Arrows and arrowheads indicate ST-mRFP-positive and -negative GNOM-GFP-labelled compartments, respectively.

Bars = 8  $\mu$ m.

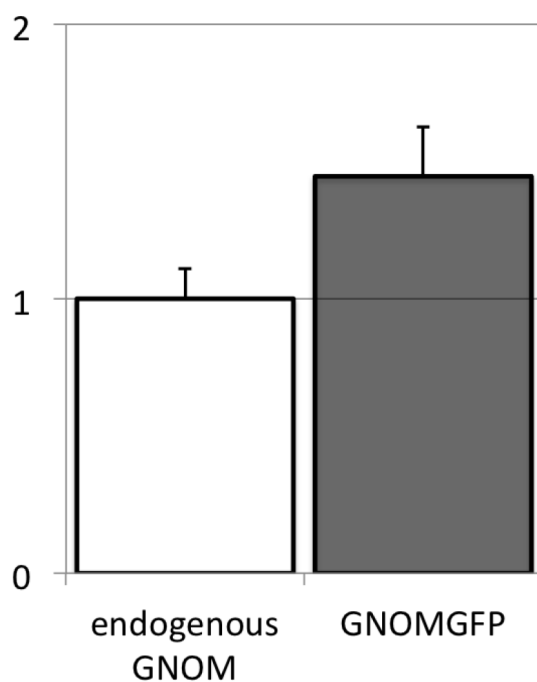

**Supplemental Figure 3.** Quantitative RT-PCR analysis of GNOM-GFP expression  
Relative expression of levels of GNOM-GFP in pGNOM::GNOM:GFP seedlings  
and endogenous GNOM in wild-type seedlings. Total RNA isolated from 5 days old seedlings  
were used for the analysis. Transcript levels were measured using real-time RT-PCR.  
The mean level of GNOM mRNA in Columbia was taken as a standard (1.0).  
Error bars indicate the SD values for data from three independent experiments.

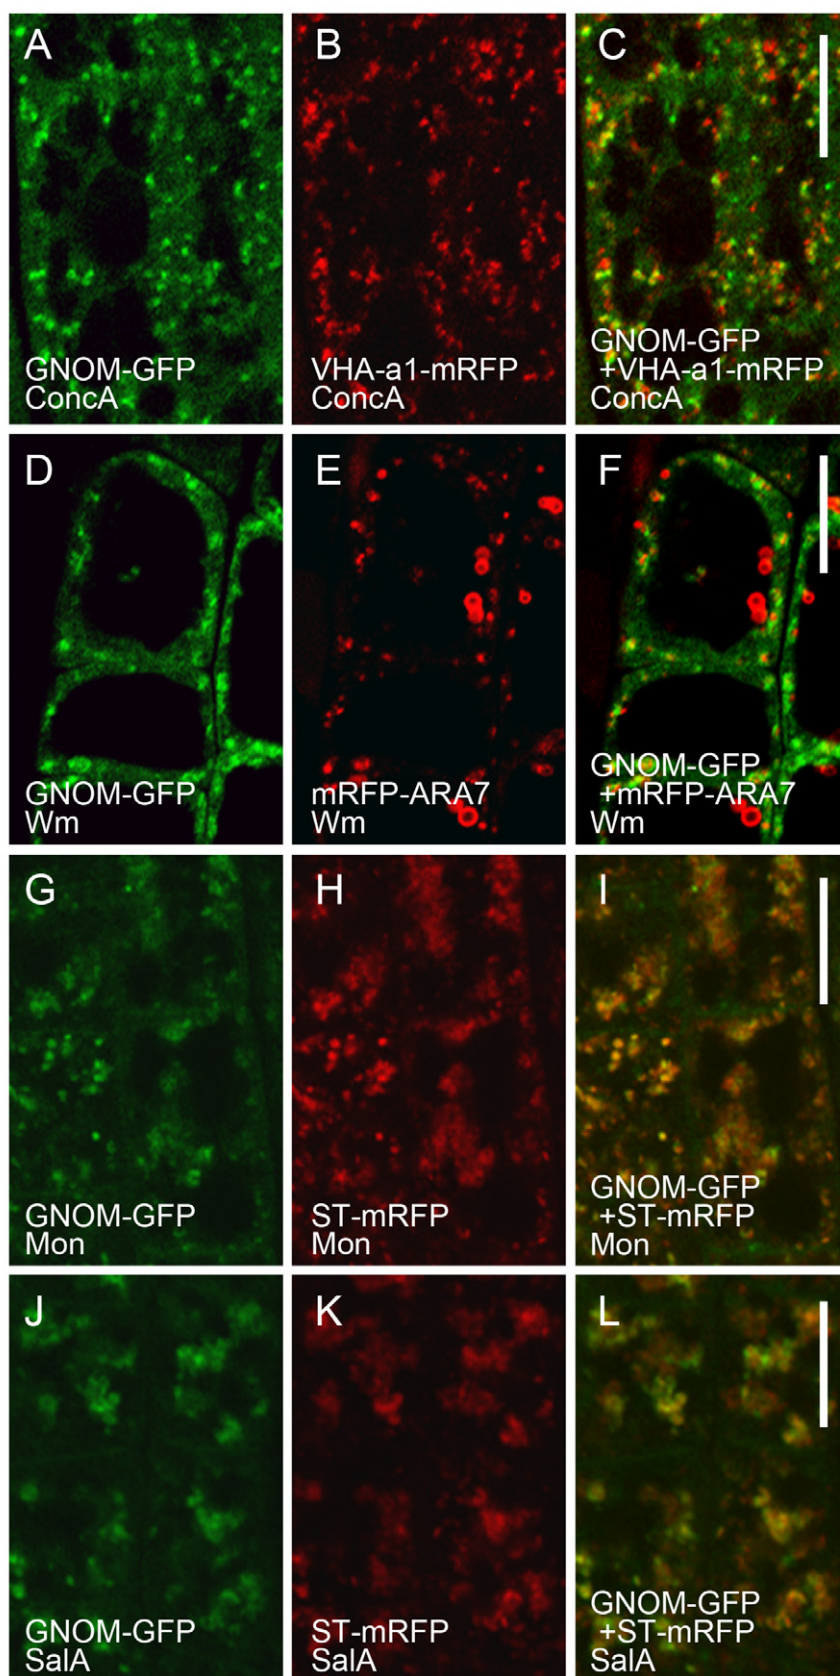

**Supplemental Figure 4.** The distribution of GNOM-GFP and RFP-tagged organelle markers in response to pharmacological interference

(A) to (C) Double-labeling of GNOM-GFP and VHA-a1-mRFP in root epidermal cells in the presence of ConcA.

(D) to (F) Root epidermal cells co-expressing GNOM-GFP and mRFP-ARA7 after the treatment with Wm.

(G) to (L) Double-labeling of GNOM-GFP and ST-mRFP in root epidermal cells treated with Mon [(G) to (I)] and SalA [(J) to (L)].

Bars = 8  $\mu$ m.

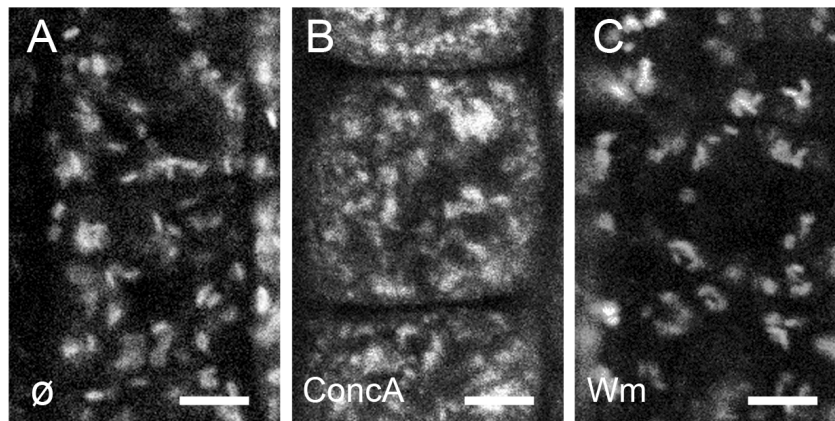

**Supplemental Figure 5.** The distribution of ST-mRFP is not strongly affected by concanamycin and wortmannin.

**(A) to (C)** Root cells expressing ST-mRFP after no treatment **(A)**, after treatment with ConcA **(B)**, and after treatment with Wm **(C)**. Treatment with ConcA and Wm was performed for 1 hr.

Bars = 4  $\mu$ m.

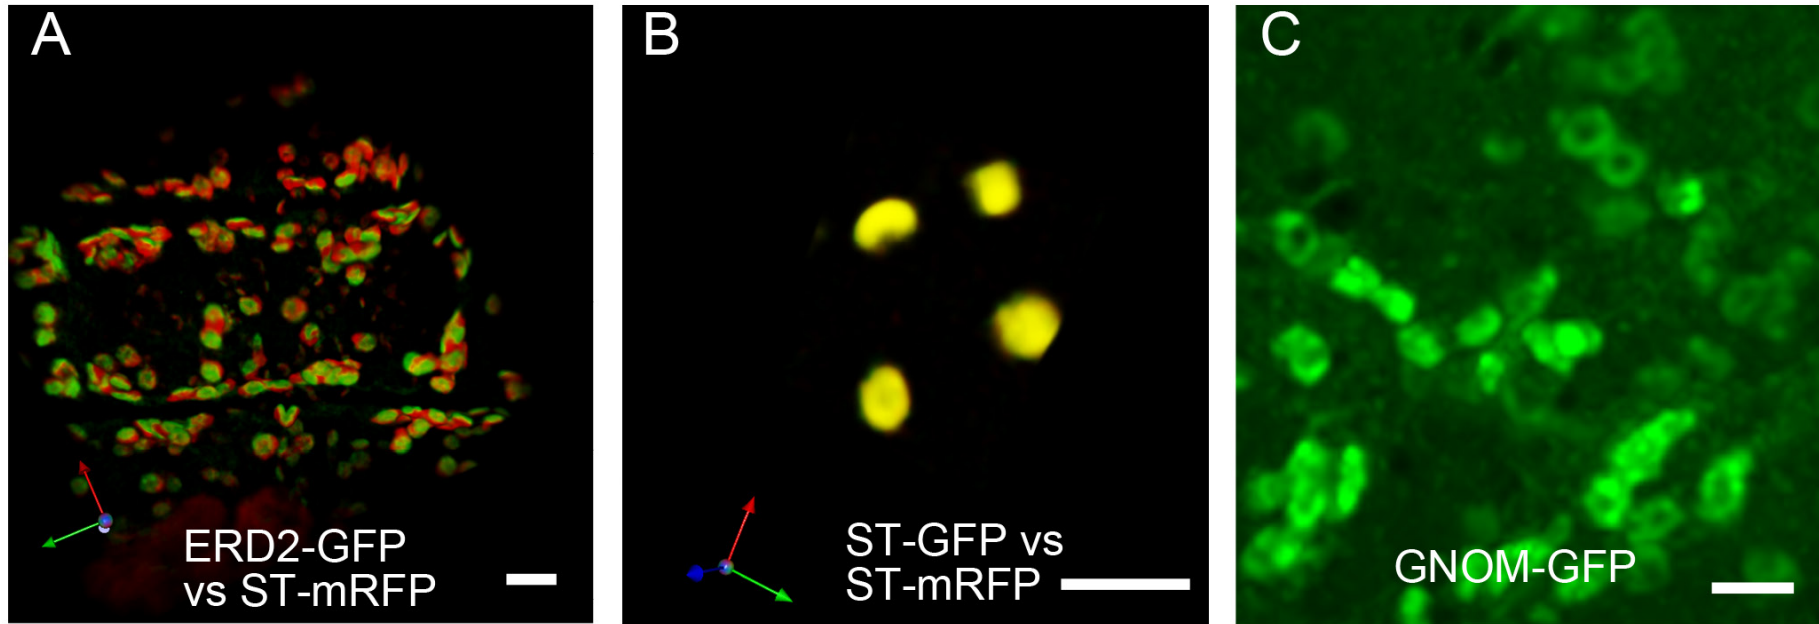

**Supplemental Figure 6.** High resolution microscopy observation systems succeeded in observing the plant Golgi apparatus.

**(A)** 3D image of the *cis*-Golgi marker, ERD2-GFP (green), and the *trans*-Golgi marker ST-mRFP (red). A merged image is shown in **(A)**. Note the clear separation of cis- and trans-Golgi cisternae.

**(B)** Double-labeling of ST-GFP (green) and ST-mRFP (red). A merged 3D image is shown in **(B)**. Note essentially complete colocalization.

**(C)** Extended focus image of GNOM-GFP. GNOM-GFP displays ring-like localization.

Bars = 2 $\mu$ m.

Supplemental Data. Naramoto et al. Plant Cell (2014) 10.1105/tpc.114.125880

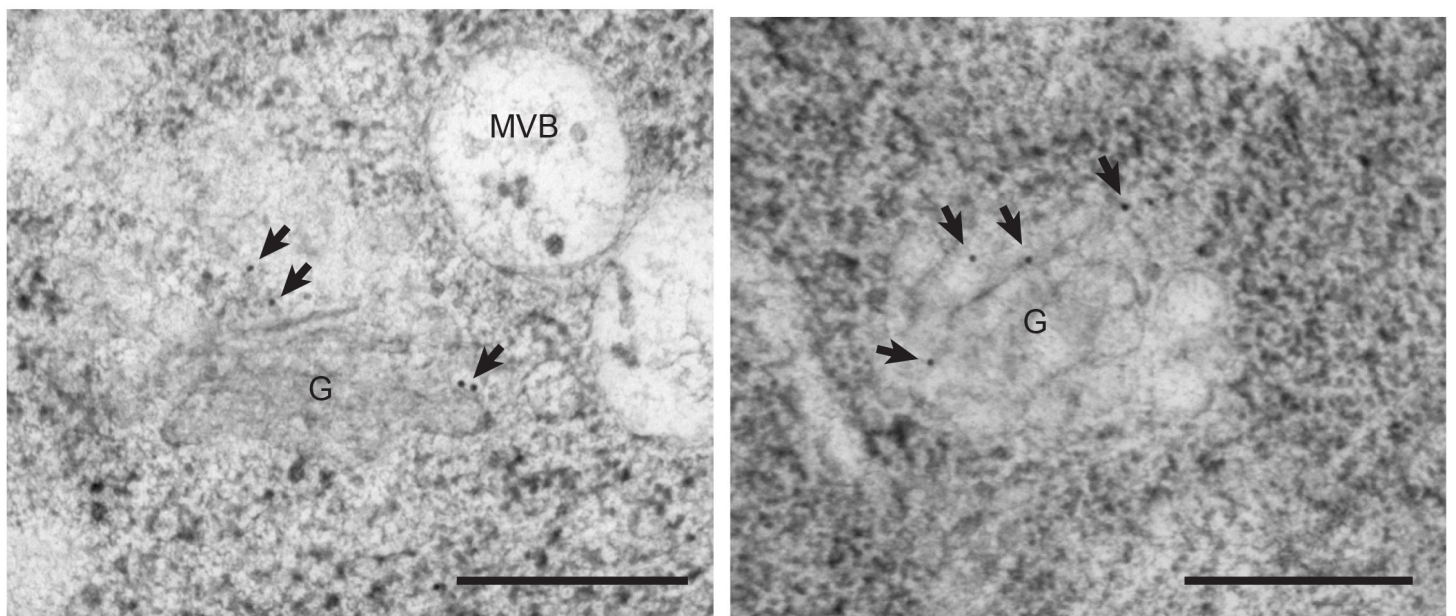

**Supplemental Figure 7.** GNOM-GFP localizes to the Golgi apparatus in BFA-untreated root cells. Series of IEM pictures showing GNOM-GFP. Note that GNOM-GFP tends to localize to the periphery of Golgi cisternae. The golgi apparatus and multi vesicular body is designated as “G” and “MVB”, respectively. Arrows indicate the localization of gold particles. Bars = 500 nm.

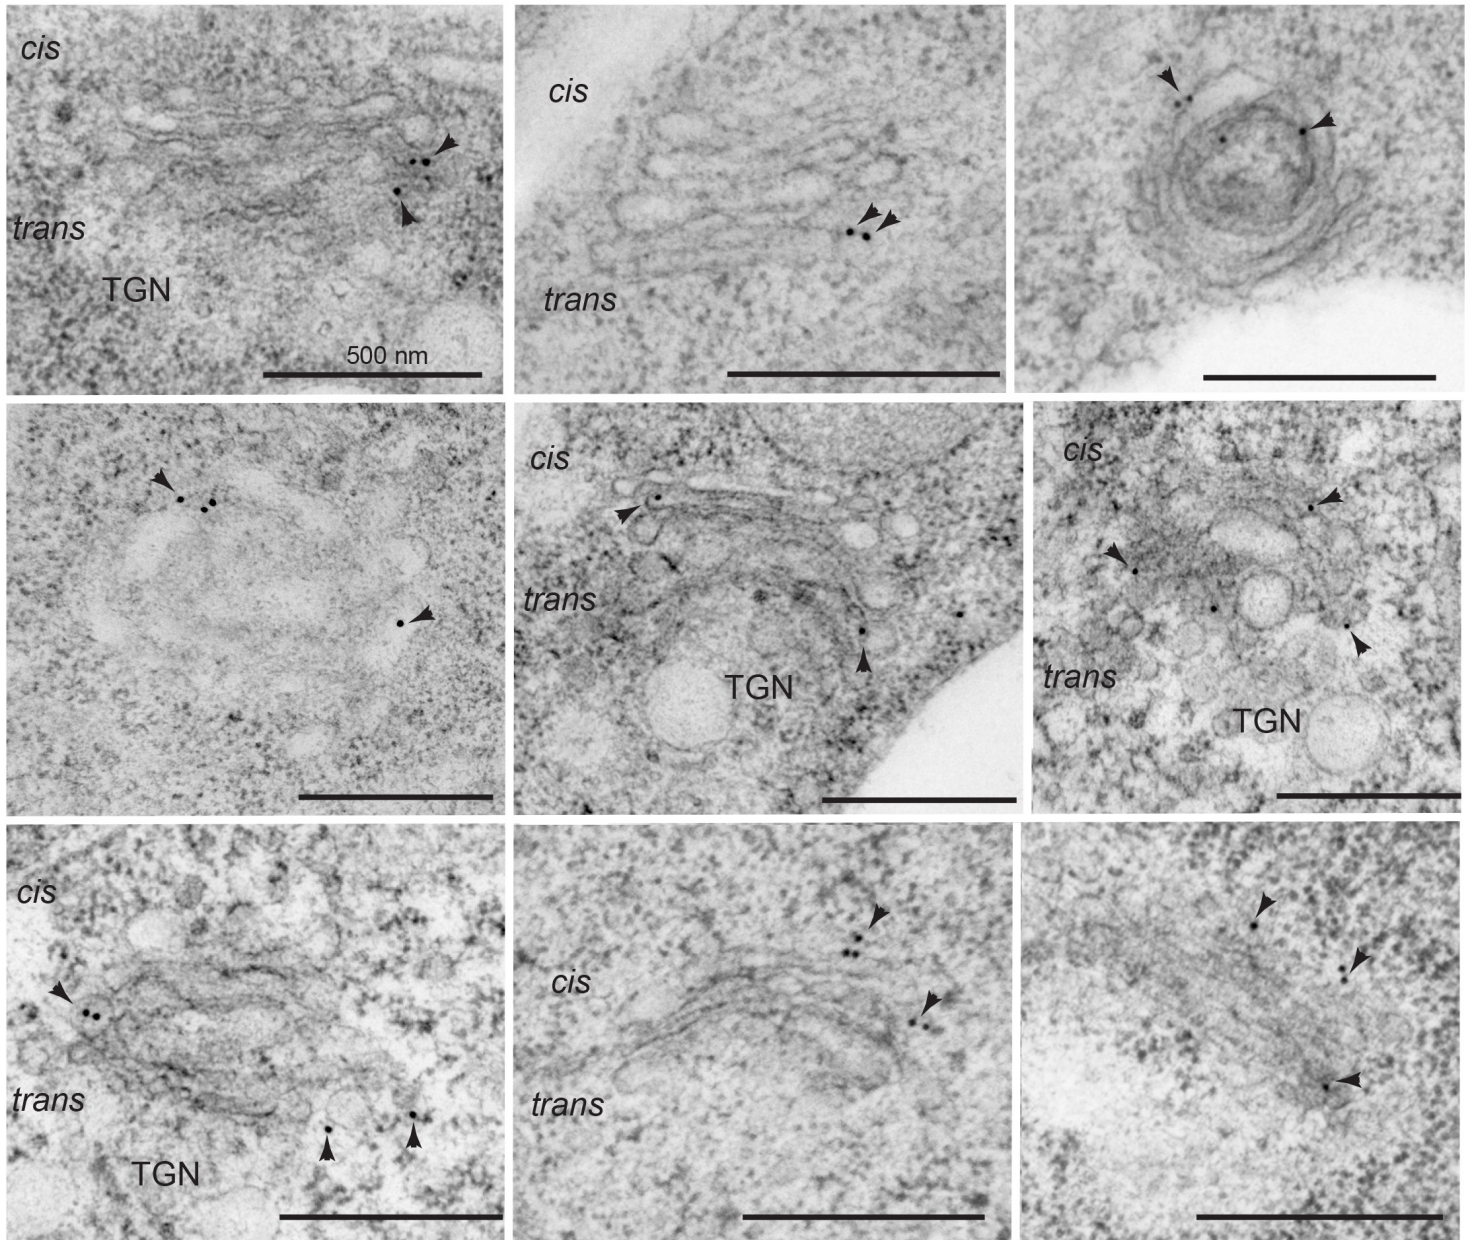

**Supplemental Figure 8.** GNOM-GFP localizes to the Golgi apparatus in BFA-treated root cells. Series of IEM pictures showing GNOM-GFP. Note that GNOM-GFP tends to localize to the periphery of Golgi cisternae. *cis* Golgi cisternae and *trans* Golgi cisternae are designated as “*cis*” and “*trans*”, respectively. Arrowheads indicate the localization of gold particles. Bars = 500 nm.



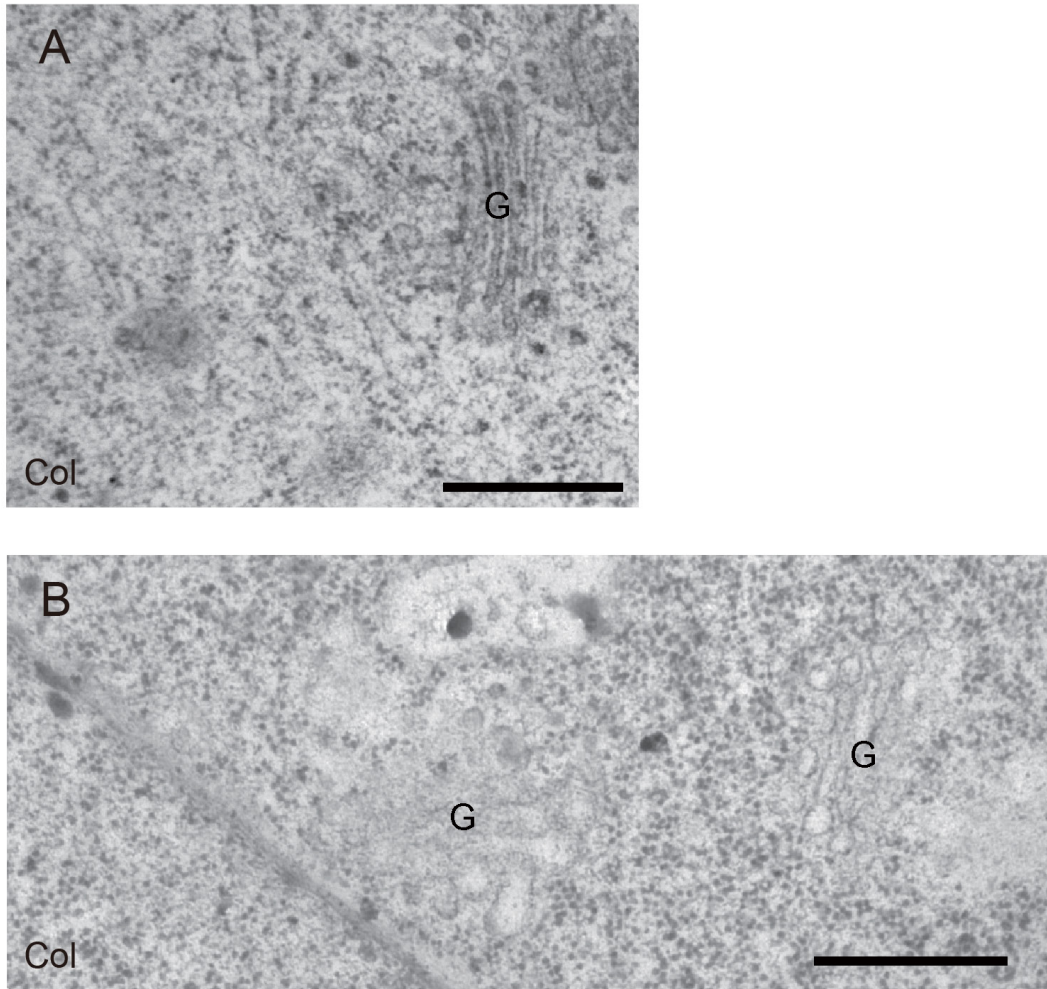

**Supplemental Figure 9.** An anti-GFP antibody does not stain the Golgi apparatus. **(A)** and **(B)** Negative controls for IEM analysis of GNOM-GFP. No signals are detected at the Golgi apparatus in either untreated **(A)** or BFA-treated **(B)** wild-type seedlings when using the anti-GFP antibody. The Golgi apparatus is designated as “G” within the figure. Bars = 500 nm.

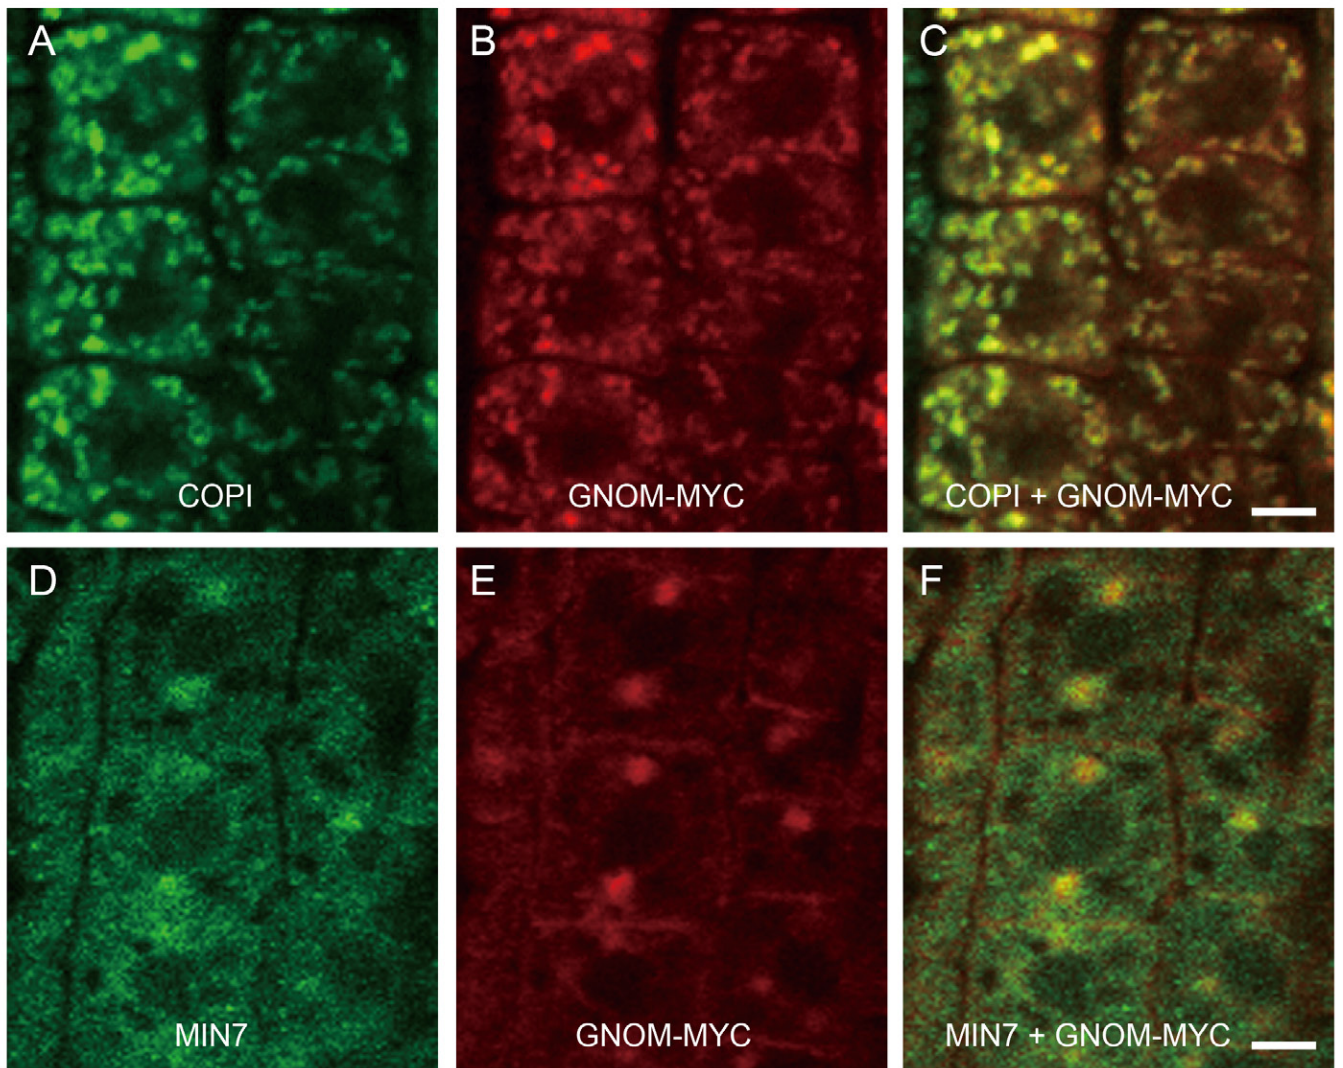

**Supplemental Figure 10.** GNOM-MYC is stabilized at the Golgi apparatus during short-time BFA treatment, and subsequently localizes at the TGN during mid-term BFA treatment.

**(A) to (C)** Double-labeling of functional BFA-sensitive GNOM-MYC (red) and anti-COPI antibody by treatment with 50 μM BFA for 5 min. The anti-COPI antibody Golgi marker **(A)** colocalizes with functional GNOM-MYC **(B)**. A merged image is shown in **(C)**.

**(D) to (F)** Double-labeling of functional BFA-sensitive GNOM-MYC (red) and anti-MIN7 antibody (green) by treatment with 50 μM BFA for 1 hr. Although GNOM-MYC localizes at the Golgi apparatus shortly after the start of BFA treatment, GNOM-MYC **(E)** localizes at MIN7-labeled TGN **(D)** after BFA treatment for 1 hr. A merged image is shown in **(F)**.

Bars = 4 μm.

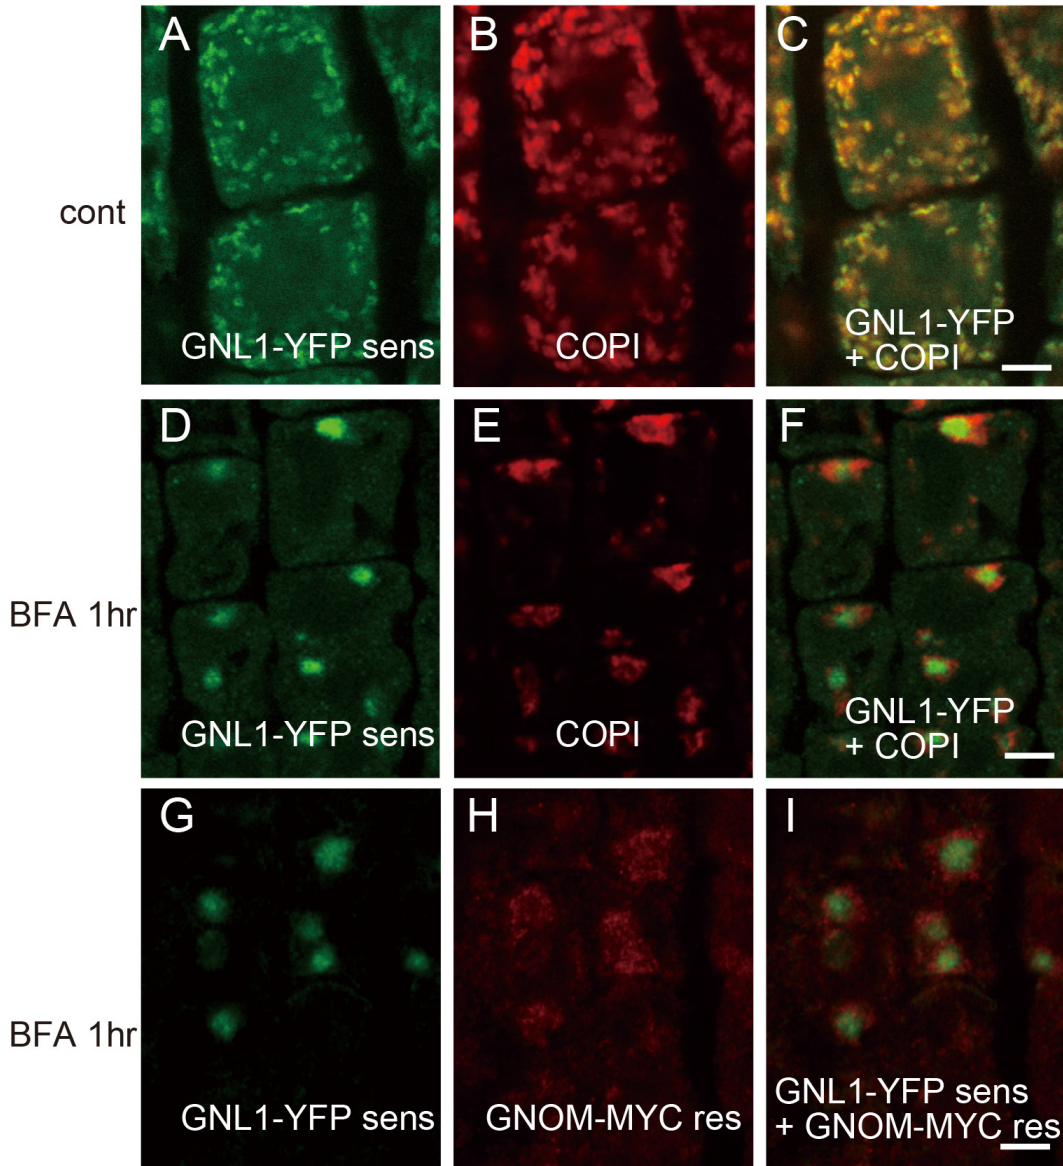

**Supplemental Figure 11.** Engineered BFA-sensitive functional GNL1-YFP translocates from the Golgi apparatus to endosomes following BFA treatment.

(A) to (I) Subcellular localization analysis of Arabidopsis root cells that co-express engineered BFA-sensitive GNL1-YFP and engineered BFA-resistant GNOM-MYC. Engineered BFA-sensitive GNL1-YFP (A) localizes to the anti-COPI antibody-labeled Golgi apparatus (B) under normal conditions. A merged image is shown in (C). By contrast, BFA-sensitive GNL1-YFP [(D) and (G)] does not localize to the Golgi apparatus labeled by the anti-COPI antibody (E) or BFA-resistant GNOM-MYC (H) following BFA treatment. Merged images are shown in (F) and (I), respectively. Note that the engineered BFA-resistant GNOM-MYC (H) appears to remain at the Golgi apparatus even after BFA treatment.

Bars = 3  $\mu$ m.

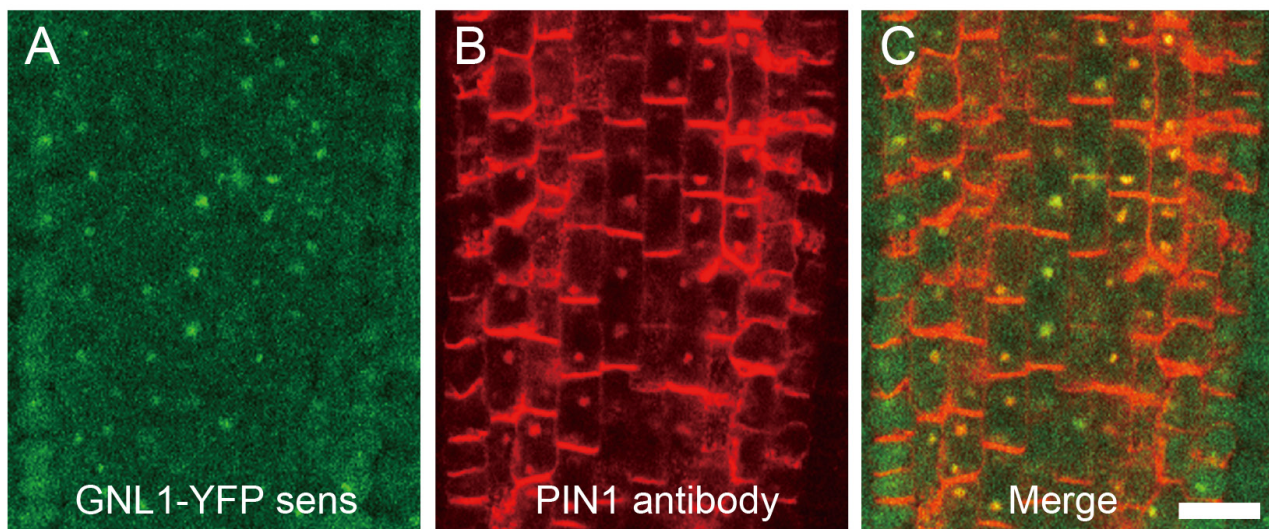

**Supplemental Figure 12.** PIN1 is internalized by the inhibition of GNL1 function. **(A)** to **(C)** Double-labeling of BFA-treated *gnl1emb30* root cells co-expressing GNL1 BFA-sensitive YFP and GNOM BFA-resistant MYC with GNL1-YFP (green) and the PIN1 antibody (red). GNL1-YFP **(A)** and the anti-PIN1 antibody **(B)** are colocalized at the BFA body **(C)** by treatment with 50  $\mu$ M BFA for 1hr. Note PIN1 internalization, suggesting inhibited recycling. Bar =10  $\mu$ m.

Supplemental Data. Naramoto et al. Plant Cell (2014) 10.1105/tpc.114.125880

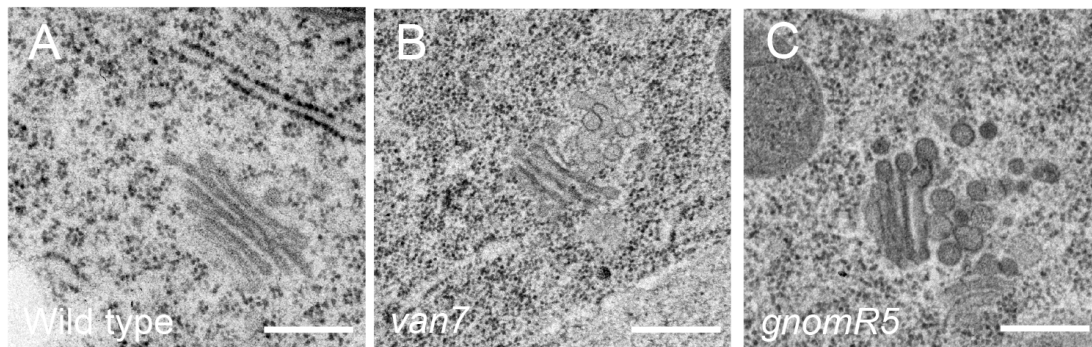

**Supplemental Figure 13.** TGN structure is malformed in *van7* and *gnomR5* mutants. **(A)** to **(C)** EM images of wild-type **(A)**, *van7* mutant **(B)**, and *gnomR5* mutant **(C)** root cells. Note that the TGN is highly vesiculated in *gnom* mutant cells. Bars = 250 nm.
